# Supplementary material for: Self-Powered Piezoelectric-Biosensing Textiles for the Physiological Monitoring and Time-Motion Analysis of Individual Sports
Source: MDPI journal article supplement (doi:10.3390/s19153310), 2019-07-27
Supplement: s1 [file s1]

# Self-Powered Piezoelectric-Biosensing Textiles for the Physiological Monitoring and Time-Motion Analysis of Individual Sports

Yupeng Mao <sup>1</sup>, Mailun Shen <sup>1</sup>, Bing Liu <sup>3</sup>, Lili Xing <sup>2</sup>, Song Chen <sup>1,\*</sup> and Xinyu Xue <sup>1,2,\*</sup>

<sup>1</sup> Physical Education Department, Northeastern University, Shenyang 110819, China

<sup>2</sup> School of Physics, University of Electronic Science and Technology of China, Chengdu 610054, China

<sup>3</sup> School of Arts, Beijing Sport University, Beijing 100084, China

\* Correspondence: chensong@pe.neu.edu.cn (S.C.); xuexinyu@mail.neu.edu.cn (X.X.); Tel.: +86-1388-923-0121 (X.X.)

Table S1. The self-powered piezo-biosensing textiles comparison with previous works.

|          | The power supply mode | The device size     | Response range | Detection range  | reference |
|----------|-----------------------|---------------------|----------------|------------------|-----------|
| Our work | self-powered          | $1.5 \times 4$ cm   | 0 - 200 +      | 0 - 25 mmol/L    |           |
| Other 1  | self-powered          | $1 \times 0.5$ cm   | 0 -95 +        | 0 - 6.385 mmol/L | 25        |
| Other 2  | External powered      | huge                | 0 - 5 +        | 0 - 10 mmol/L    | 38        |
| Other 3  | External powered      | $2.5 \times 7.5$ cm | 0 - 38 +       | 0 - 3 mmol/L     | 39        |

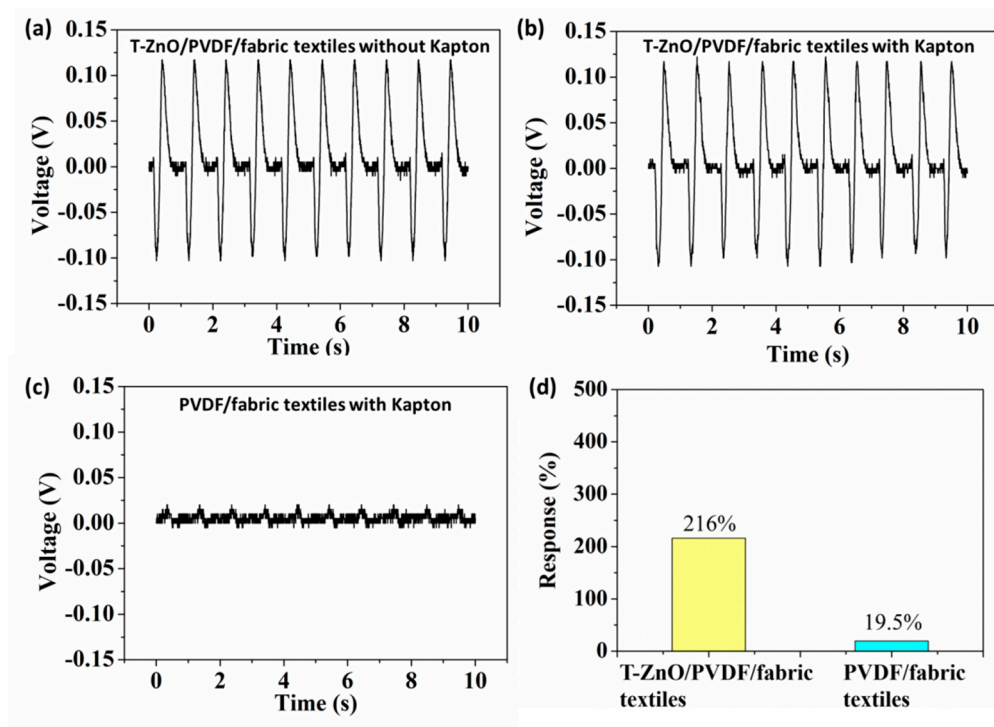

Figure S1. (a) The output voltage of T-ZnO/PVDF/fabric textiles without Kapton substructure. (b) The output voltage of T-ZnO/PVDF/fabric textiles with Kapton substructure. (c) The voltage of PVDF/fabric textiles with Kapton substructure. (d) The response of T-ZnO/PVDF/fabric textiles and PVDF/fabric textiles against 24 mmol/L lactate, respectively.

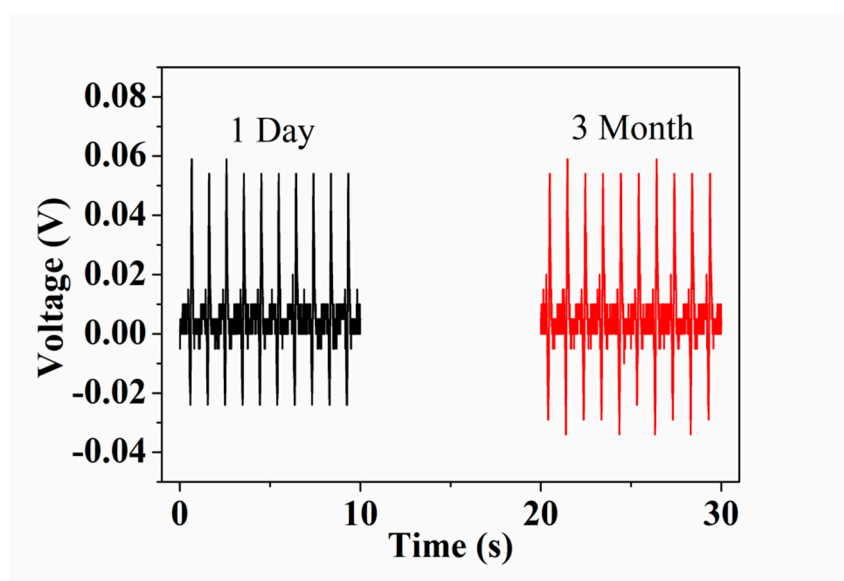

Figure S2. The output voltage of one device after one day and three months, respectively.

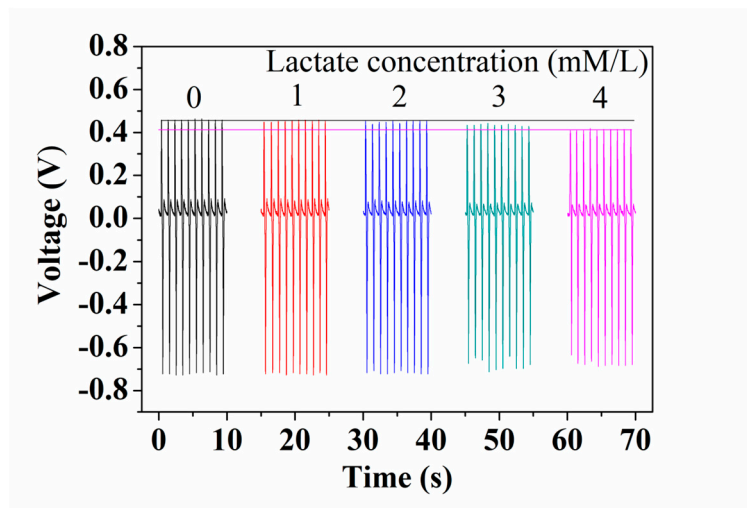

**Figure S3.** The sensitivity limit of self-powered piezoelectric-biosensing textiles for detecting lactate concentration
